# Supplementary material
Source: HighWire-hosted journal article supplement (http://molpharm.aspetjournals.org/highwire/filestream/77146/field_highwire_adjunct_files/0/Mol_Pharm_Sup.pdf)
Supplement: Mol_Pharm_Sup.pdf [file Mol_Pharm_Sup.pdf]

# **Molecular Pharmacology**

## **Supplementary Information**

**5-Cholesten-3 $\beta$ ,25-diol 3-sulfate Decreases Lipid Accumulation in Diet-induced**

**Nonalcoholic Fatty Liver Disease Mouse Model**

**Leyuan Xu, Jin Koung Kim, Qianming Bai, Xin Zhang, Genta Kakiyama, Hae-ki Min, Arun**

**J. Sanyal, William M. Pandak, and Shunlin Ren**

Department of Internal Medicine, Virginia Commonwealth University and McGuire Veterans

Affairs Medical Center, Richmond, VA, USA

### **Supplementary Figure 1. Mass spectral analysis of 25HC3S.**

Characterization of the chemically synthesized and purified 5-cholesten-3 $\beta$ ,25-diol 3-sulfonate was analyzed by negative ion-triple quadrupole mass spectrometer (Peking University, China), which shows the same molecular mass ion,  $m/z$  481 as the “authentic” nuclear oxysterol and the purified product was not contaminated by the starting material, 25-hydroxycholesterol,  $m/z$  401.

### **Supplementary Figure 2. Proton nuclear magnetic resonance spectroscopy of 25HC3S.**

$^1\text{H}$  NMR analysis shows that the proton resonance at C3 with multiple small (1.5 Hz) splits near 3.65 ppm in the spectrum of 25-hydroxycholesterol (starting material) is shifted to 4.20 ppm in the product spectrum, which confirms that a  $\text{HSO}_3^-$  group is added at the C3 position of 25-hydroxycholesterol. The results indicate that the synthesized molecule is 5-cholesten-3 $\beta$ ,25-diol 3-sulfonate (25HC3S).

**Supplementary Table. 1. Primer sets for real time RT-PCR analysis of gene expression**

| Name                  | GenBank No. | Forward Sequence         | Reverse Sequence         |
|-----------------------|-------------|--------------------------|--------------------------|
| SREBP-1c              | NM_011480   | AGCAGCCCCTAGAACAAACAC    | CAGCAGTGAGTCTGCCTTGAT    |
| ACC1                  | NM_133360   | ATGGGCGGAATGGTCTCTTTC    | TGGGGACCTTGTCTTCATCAT    |
| FAS                   | NM_007988   | AGAGATCCCCGAGACGCTTCT    | GCCTGGTAGGCATTCTGTAGT    |
| LXR $\alpha$          | NM_013839   | GAGCCGACAGAGCTTCGTC      | GCGTGCTCCCTTGATGACA      |
| CPT1                  | NM_013495   | CTCCGCCTGAGCCATGAAG      | CACCAGTGATGATGCCATTCT    |
| PPAR $\alpha$         | NM_011144   | AGAGCCCCATCTGTCCTCTC     | ACTGGTAGTCTGCAAAACCAAA   |
| ACOX1                 | NM_015729   | TCCAGACTTCCAACATGAGGA    | CTGGGCGTAGGTGCCAATTA     |
| MCAD                  | NM_007382   | AGGGTTTAGTTTTGAGTTGACGG  | CCCCGCTTTTGTCAATTTCCG    |
| SCAD                  | NM_007383   | ACAGTGGATCACCCCTTTCAC    | ACCCATGAGTCACCCTCTTCC    |
| PPAR $\gamma$         | NM_008904   | TATGGAAGTGACATAGAGTGTGCT | CCACTTCAATCCACCCAGAAAAG  |
| FABP1                 | NM_017399   | CTGACACCCCTTGATGTCC      | ATGAACTTCTCCGGCAAGTAC    |
| FATP1                 | NM_011977   | CGCTTTCTGCGTATCGTCTG     | GATGCACGGGATCGTGTCT      |
| GPAM                  | NM_008149   | ACAGTTGGCACAATAGACGTTT   | CCTTCCATTTCAAGTGTGCAGA   |
| MTPP                  | NM_008642   | CTCTTGGCAGTGCTTTTTCTCT   | GAGCTTGTATAGCCGCTCATT    |
| PLTP                  | NM_011125   | CGCAAAGGGCCACTTTTACTA    | GCCCCATCATATAAGAACCAG    |
| SREBP-2               | NM_033218   | TGAAGGACTTAGTCATGGGGAC   | CGCAGCTTGTGATTGACCT      |
| HMGR                  | NM_008255   | AGCTTGCCCGAATTGTATGTG    | TCTGTTGTGAACCATGTGACTTC  |
| ABCA1                 | NM_013454   | AAAACCGCAGACATCCTTCAG    | CATACCGAAACTCGTTCACCC    |
| ABCG1                 | NM_009593   | GCTCCATCGTCTGTACCATCC    | TGTTCTGATCCCCGTACTION    |
| ABCG5                 | NM_031884   | ATTATGTGCATCTTAGGCAGCTC  | CGTAGGAGAAGCAGTCTTGGAA   |
| CYP7 $\alpha$         | NM_007824   | AACGGGTTGATTCCATACCTGG   | GTGGACATATTTCCCATCAGTT   |
| CYP27 $\alpha$        | NM_024264   | GACAACCTCCTTTGGGACTTAC   | GTGGTCTCTTATTGGGTACTION  |
| LDLR                  | NM_010700   | AGTGGCCCCGAATCATTGAC     | CTAACTAAACACCAGACAGAGGC  |
| SRB1                  | NM_016741   | TTTGGAGTGGTAGTAAAAGGGC   | TGACATCAGGGACTCAGAGTAG   |
| CD36                  | NM_007643   | ATGGGCTGTGATCGGAACTG     | GTCTTCCAATAAGCATGTCTCC   |
| G6Pase                | NM_008061   | TCGGAGACTGGTTCAACCTC     | AGGTGACAGGGACTIONGCTTTAT |
| PCK1                  | NM_011044   | CTGCATAACGGTCTGGACTTC    | CAGCAACTGCCCGTACTCC      |
| GCK                   | NM_010292   | AGGAGGCCAGTGTAAGATGT     | CTCCCAGGTCTAAGGAGAGAAG   |
| Pklr                  | NM_013631   | TCAAGGCAGGGATGAACATTG    | CACGGGTCTGTAGCTGAGTG     |
| IL1 $\alpha$          | NM_010554   | CTGATGAAGCTCGTCAGGCAG    | TGGTGCTGAGATAGTGTGCTC    |
| IL1 $\beta$           | NM_008361   | GCAACTGTTCTGAACTCAACT    | ATCTTTTGGGGTCCGTCAACT    |
| NF $\kappa$ B (Rela)  | NM_009045   | GCGCGGGGACTATGACTTG      | GCCCGGTTATCAAAAATCGGAT   |
| TNF $\alpha$          | NM_013693   | CCCTCACACTCAGATCATCTTCT  | GCTACGACGTGGGCTACAG      |
| I $\kappa$ B $\alpha$ | NM_010907   | TGAAGGACGAGGAGTACGAGC    | TTCGTGGATGATTGCCAAGTG    |
| GAPDH                 | NM_008084   | CATGTTCCAGTATGACTCCACTC  | GGCCTCACCCATTTGATGT      |
| $\beta$ -actin        | NM_007393   | GGCTGTATCCCCTCCATCG      | CCAGTTGGTAACAATGCCATGT   |
